# Supplementary material
Source: PubMed Central journal article supplement (PMC1952225)

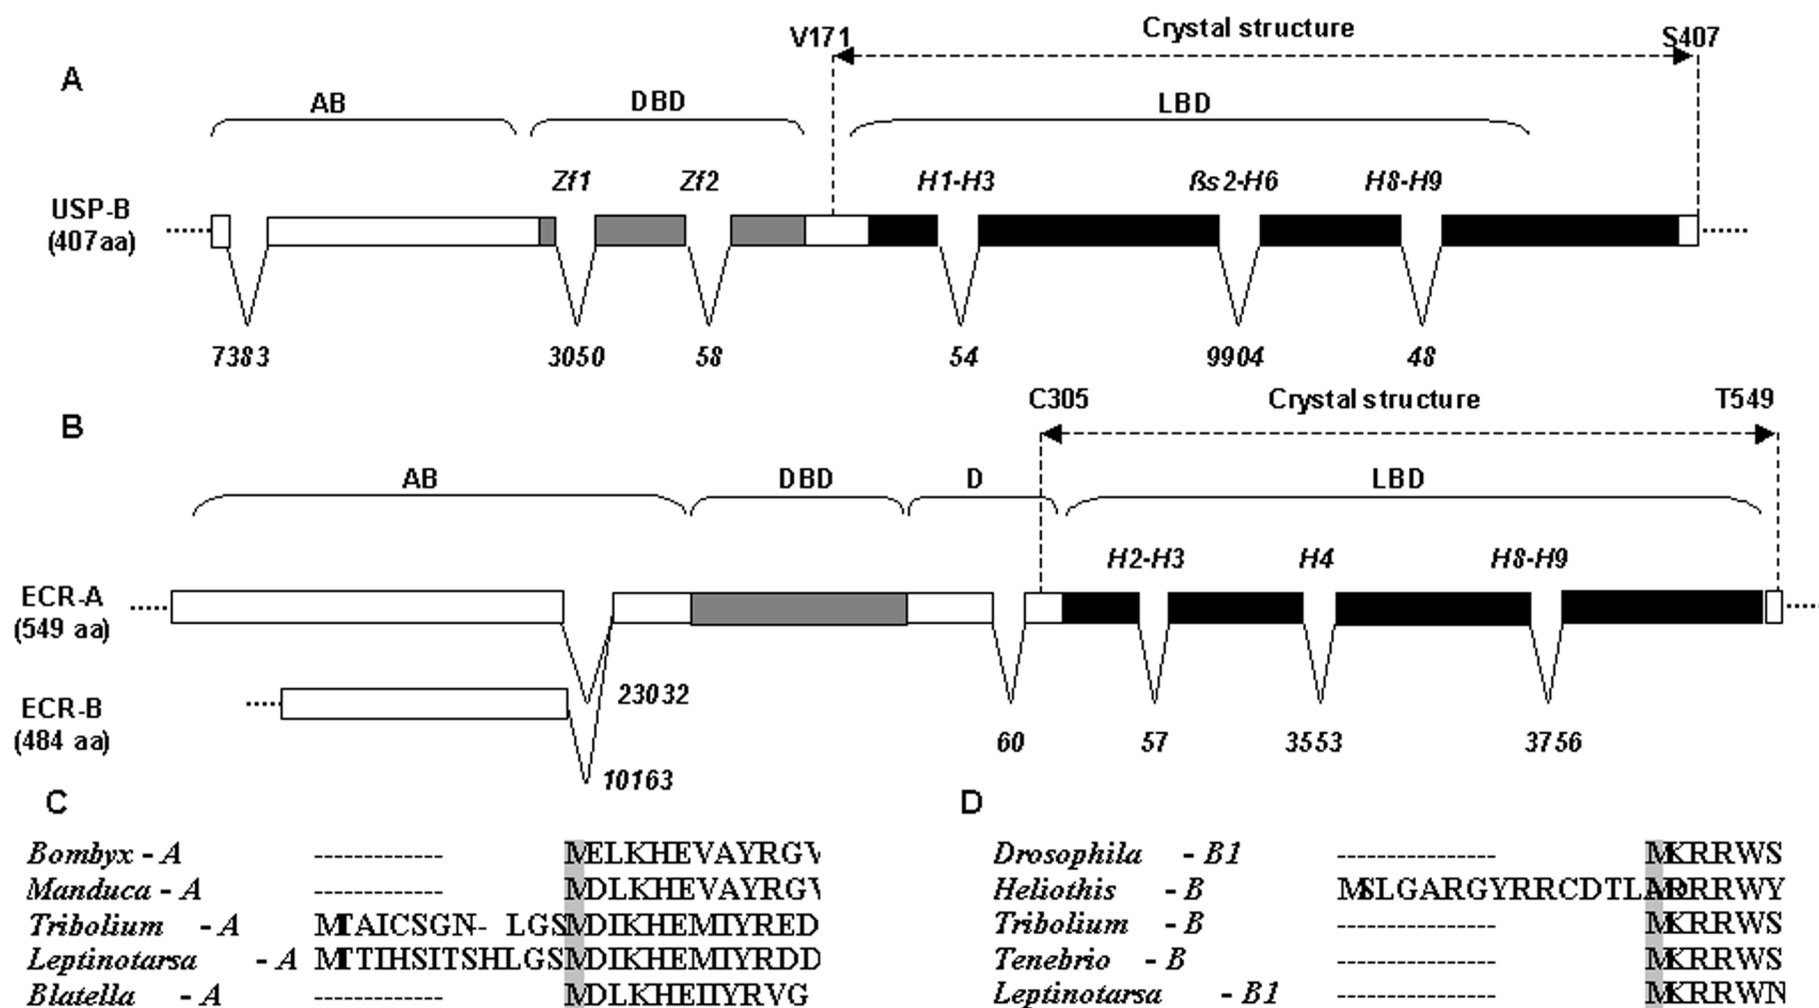

Figure S1

Supplement: 7601810s5.pdf [file 7601810s5.pdf]

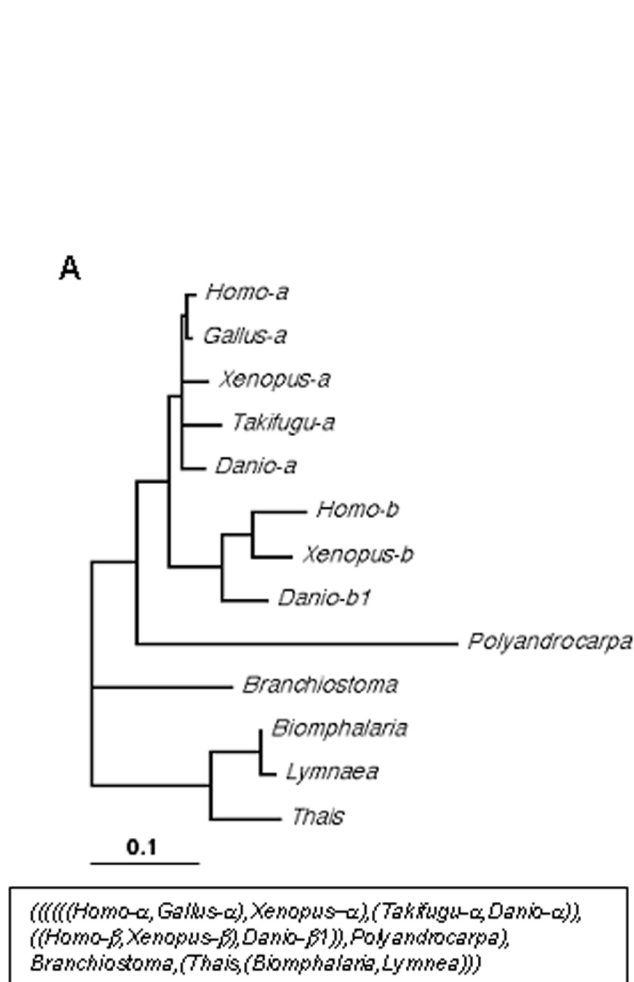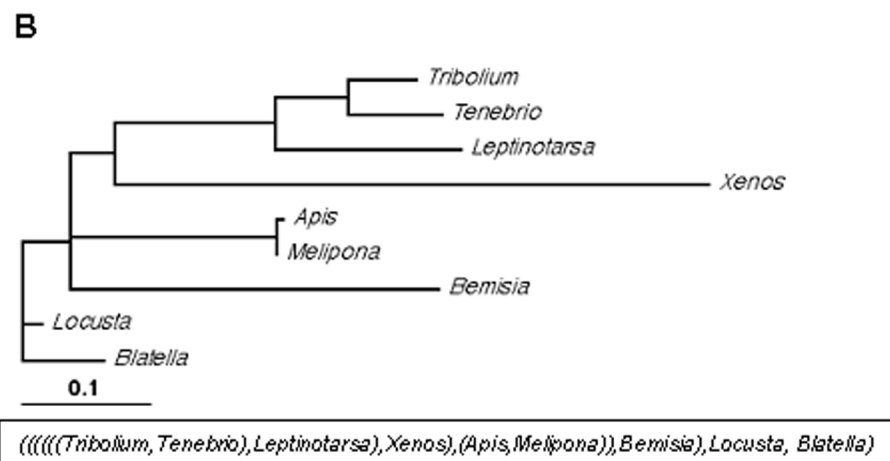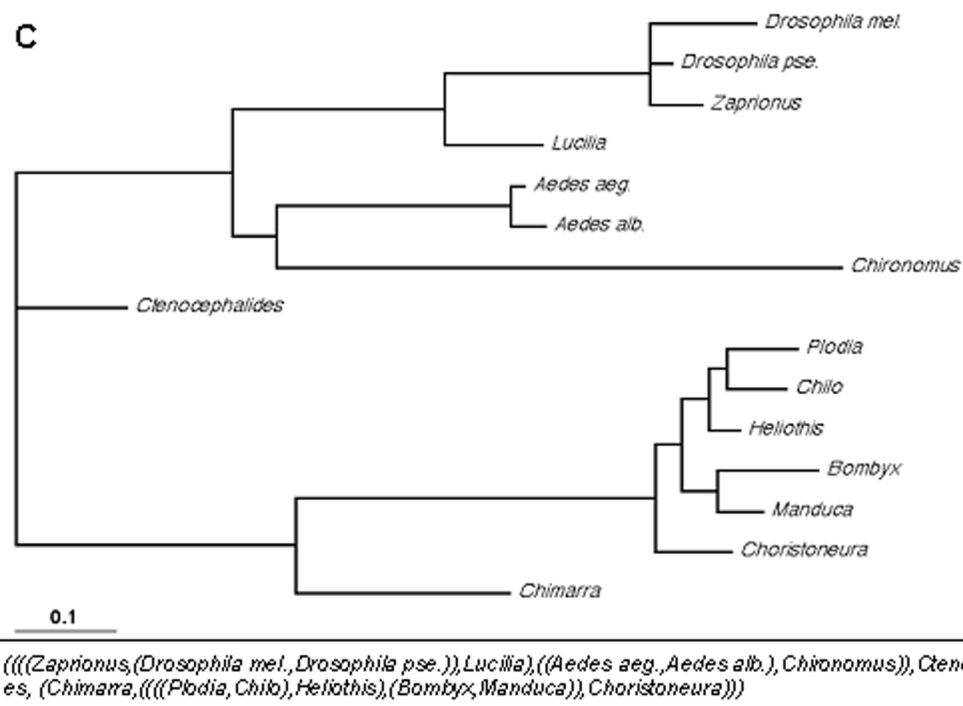

**Figure S2**

Supplement: 7601810s6.pdf [file 7601810s6.pdf]
